# Supplementary material for: HiLDA: a statistical approach to investigate differences in mutational signatures
Source: PeerJ journal article supplement (doi:10.7717/peerj.7557), 2019-08-28

**Figure S1.**

The HiLDA diagram in plate notation.

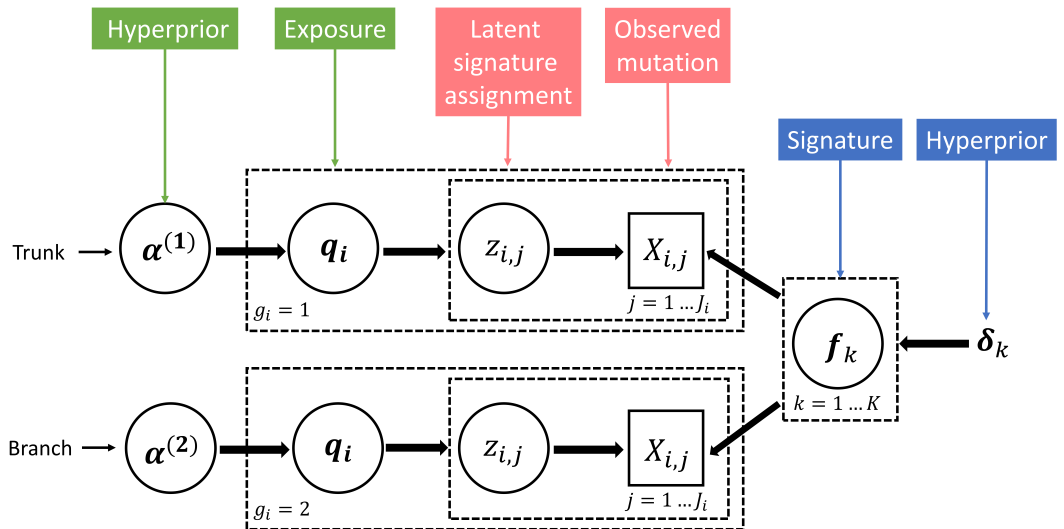

Supplement: Figure_S1.pdf [file Figure_S1.pdf]
