# Supplementary material for: HiLDA: a statistical approach to investigate differences in mutational signatures
Source: PeerJ. 2019 Aug 28;7:e7557. doi: 10.7717/peerj.7557 (PMC6717498; doi:10.7717/peerj.7557)
Supplement: Table S1 [file peerj-07-7557-s002.xlsx]

## Sheet: Sheet1
Table S1.The number of somatic mutations in the 32 mutational catalogs from 16 colon tumors in the USCdata, along with their associated trunk and branch mutations.
Tumor	Side A	Side B	Trunk	Branch
W*	1751	1762	1578	357
N	630	733	430	503
M	567	526	452	189
G	546	407	244	465
S	384	375	235	289
T	295	375	175	320
D	295	299	173	248
J	308	285	227	139
O	268	269	210	117
A	236	217	146	161
U	224	220	171	102
K	200	218	52	314
P	174	215	103	183
X	181	208	126	137
Kc	136	84	49	122
F	82	84	50	66
Total	6277	6277	4421	3712
*Sample W is microsatellite instable
